# Supplementary material for: Patients with asthma or chronic obstructive pulmonary disease (COPD) can generate sufficient inspiratory flows via Easyhaler® dry powder inhaler: a pooled analysis of two randomized controlled trials
Source: PubMed Central journal article supplement — J Thorac Dis. 2021 Feb;13(2):621–31. doi: 10.21037/jtd-20-2112 (PMC7947512; doi:10.21037/jtd-20-2112), 2021-02
Supplement: jtd-13-02-621-dss.pdf [file jtd-13-02-621-dss.pdf]

## Data Sharing Statement

|                     |                                                                                                                                                    |                                                                                                                    |
|---------------------|----------------------------------------------------------------------------------------------------------------------------------------------------|--------------------------------------------------------------------------------------------------------------------|
| <b>Article Info</b> | <a href="http://dx.doi.org/10.21037/jtd-20-2112">http://dx.doi.org/10.21037/jtd-20-2112</a>                                                        |                                                                                                                    |
| <b>Item</b>         | <b>Question</b>                                                                                                                                    | <b>Authors' Response<br/>(place "-" if not applicable)</b>                                                         |
| 1                   | Would you like to share data collected for your study to others?                                                                                   | Data are available from the authors upon reasonable request and with permission of Orion Corporation Orion Pharma. |
| 2                   | If not, would you like to share the reason for your decision?                                                                                      | NA                                                                                                                 |
| 3                   | What data in particular will be shared?                                                                                                            | Data compiled for this manuscript                                                                                  |
| 4                   | Any other documents will be share? Such as study protocol, statistical analysis plan, informed consent form, clinical study report, analytic code. | No                                                                                                                 |
| 5                   | When will data availability begin?                                                                                                                 | NA                                                                                                                 |
| 6                   | When will data availability end?                                                                                                                   | NA                                                                                                                 |
| 7                   | To whom will you share the data?                                                                                                                   | Upon request                                                                                                       |
| 8                   | For what type of analysis or purpose?                                                                                                              | NA                                                                                                                 |
| 9                   | How or where can the data/documents be obtained?                                                                                                   | Defined upon data request received                                                                                 |
| 10                  | Any other restrictions?                                                                                                                            | No                                                                                                                 |
